# Supplementary material
Source: ML conference proceedings conference paper supplement (https://openaccess.thecvf.com/content/ICCV2023/html/Zhang_DMNet_Delaunay_Meshing_ICCV_2023_paper.html)
Supplement: Supplementary file 2 [file Zhang_DMNet_Delaunay_Meshing_ICCV_2023_supplemental.zip]

Archive with 2 entries (2 files):
- DMNet-Supplementary.pdf
- DMNet-Video.mp4
